# Supplementary material
Source: Springer Nature journal article supplement (https://mijn.bsl.nl/resource/supplementary/13047_2011_348_MOESM2_ESM.pdf/7110620)

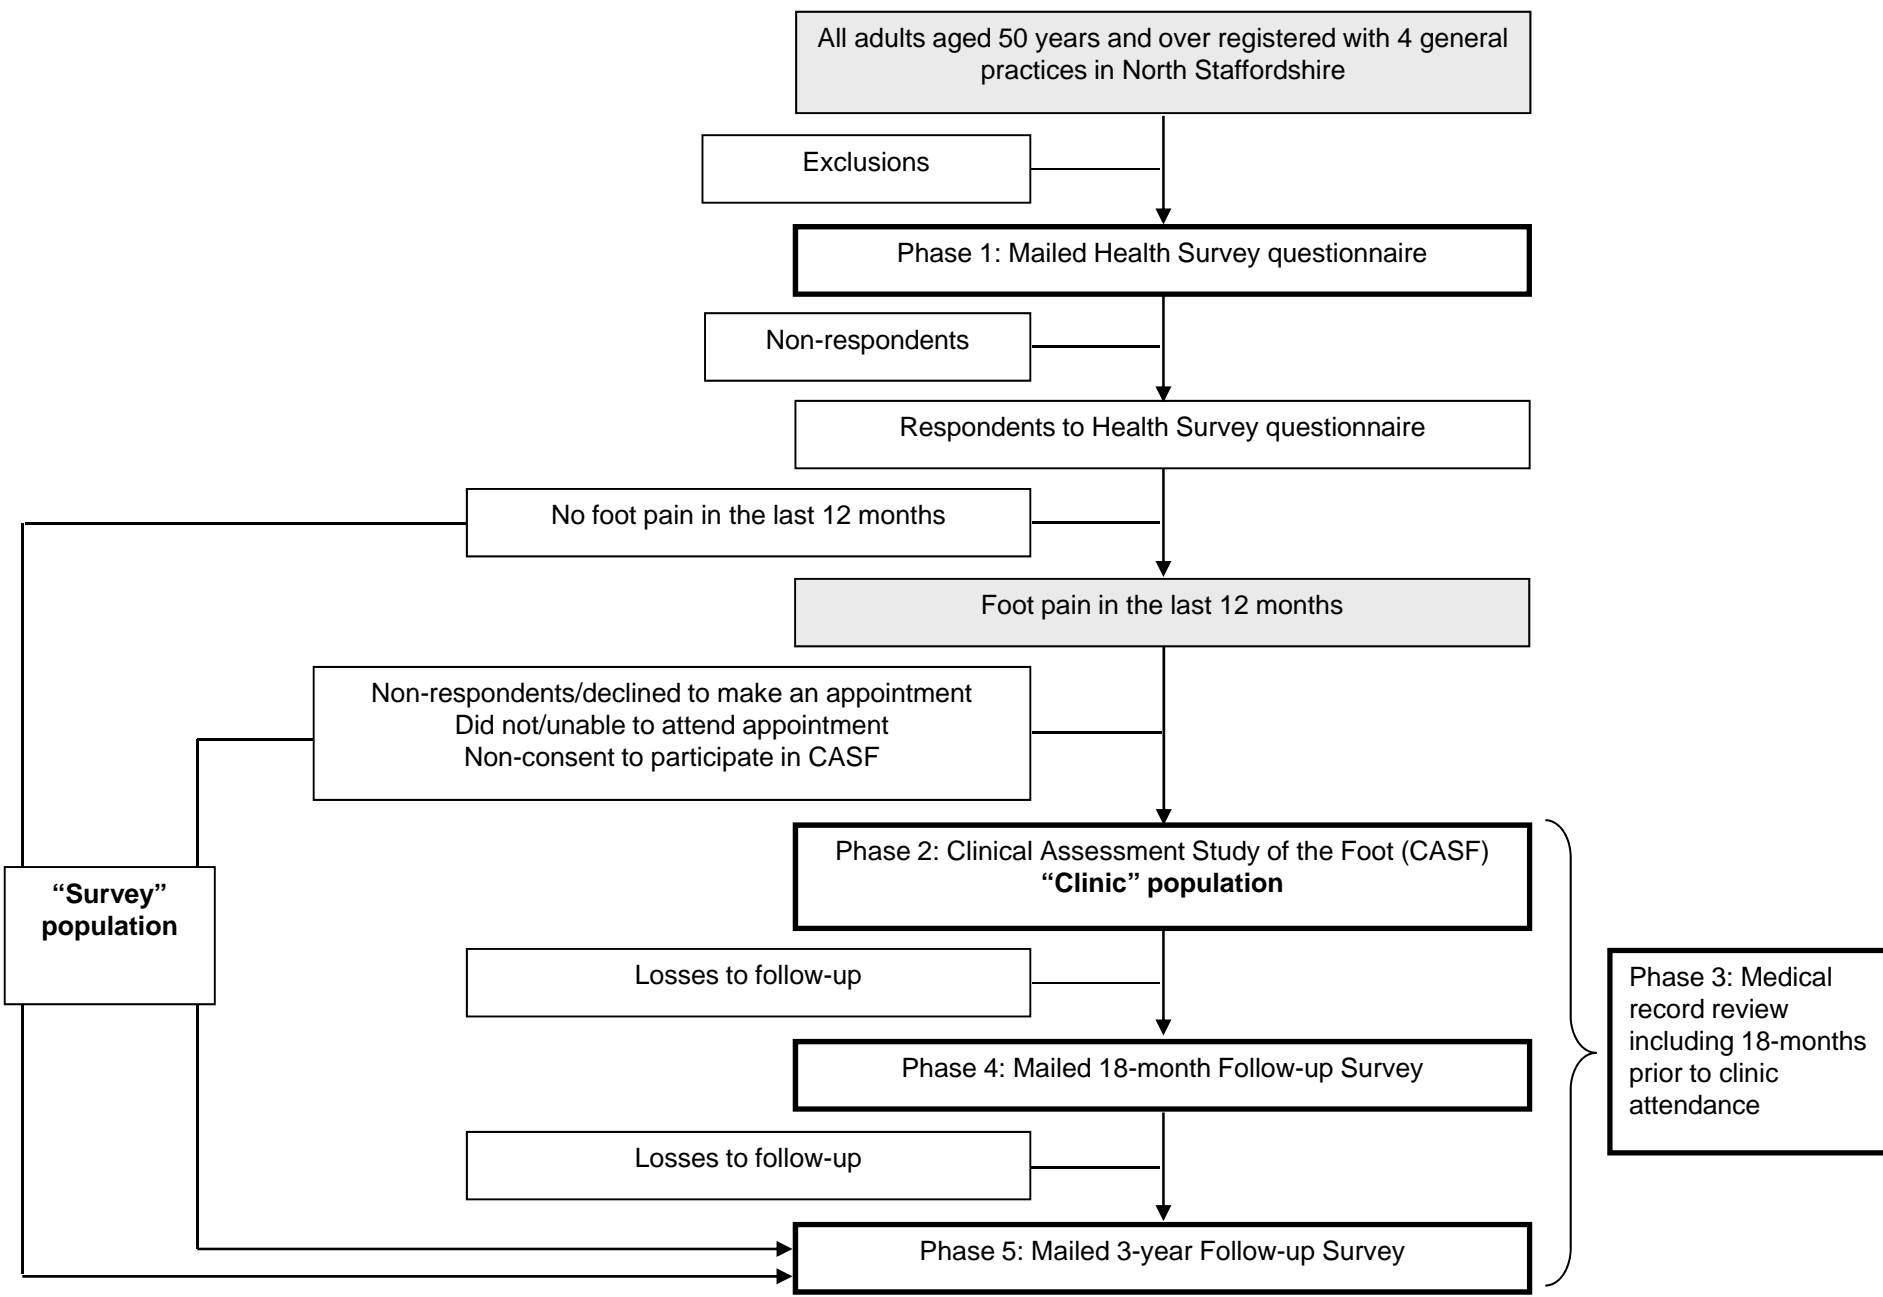

Data collection points are in bold

Supplement: MOESM2 [file 7110620]
